# Supplementary material for: The PAV trial: Does lactobacillus prevent post-antibiotic vulvovaginal candidiasis? Protocol of a randomised controlled trial [ISRCTN24141277]
Source: Springer Nature journal article supplement (doi:10.1186/1471-2296-5-5), 2004-03-28
Supplement: Additional file 8 [file 1471-2296-5-5-s8.doc]

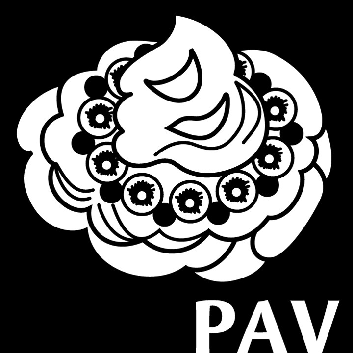


**PAV Study**

- thrush after antibiotics

# About this study

## Why?

Vaginal candidiasis or thrush is a very common and irritating problem for many women. It may cause symptoms of vaginal itch and irritation and/or discharge. Antibiotics are commonly associated with thrush in women.

Your general practice is working with the University of Melbourne in research to try to improve women’s health by testing a commonly used alternative therapy for thrush - lactobacillus. Currently we do not know if this works or not to prevent thrush after antibiotics.

## Who?

- This research is being conducted by Drs Marie Pirotta, Jane Gunn, Sonia Grover and Prof Suzanne Garland through the Department of General Practice, University of Melbourne.
- The research is funded through the Shepherd Foundation, the Royal Australian College of General Practitioners and a scholarship from the Department of Health and Aged Care.
- Please ring Dr Marie Pirotta on 0417 102 643 or 8344 9723 if you have any concerns or questions about the study in general.

## What?

- This trial tests whether a commonly used remedy (lactobacillus, an ingredient in some yoghurts) really works to prevent women getting thrush when they are taking antibiotics.
- The lactobacillus will be given as both an oral powder by mouth with water and as a pessary to be placed into the vagina overnight.
- Lactobacillus will be tested against inactive powder and placebo.
- These are also known as the “interventions”, as no one will know whether you have been given the active or inactive forms.
- You have a 1 in 4 chance of having an inactive form of both powder and pessary and 1 in 4 chance of having active forms of both.
- Your doctor will continue to care for you in the usual manner, whether you choose to participate in the trial or not.
- Your participation is voluntary and you are free to withdraw from the study at any time.

To participate, you will have already:

1. filled in an de-identified survey, mainly to help us understand if women involved in the study are more prone to thrush than other women,
2. taken a vaginal swab yourself in private in the clinic (to find how commonly women in the study carry thrush in their vagina with no symptoms before commencing the antibiotics) .

## What next?

- You have been provided with two containers of ‘intervention’ (the lactobacillus and placebos that are being tested). Please use half a teaspoon of the powder mixed in water by mouth twice a day and insert a pessary into your vagina overnight for ten days. Please don’t eat for at least 20 minutes after taking the powder.
- Both the powder and pessaries need to be refrigerated. Please only remove from the refrigerator briefly when you are taking your dose.
- In about two weeks from the day your GP asked you about this study, please take a second vaginal swab – swab B. This will be about 4 days after you finish your interventions.
- Please take swab B on a weekday morning so that the courier company can collect it either from your home or work or from your GP’s clinic.
- This swab may be returned to your doctor’s surgery for collection OR you can call the courier company
- Couriers Please 1300 36 1000.
  - Then press 2;
  - quote phone number 0417 102 643;
  - pick-up for Dr Marie from Dept of General Practice, University of Melbourne;
  - from private house or business (your address);
  - to Flemington;
  - voucher attached to envelope.
- There is a voucher on the envelope for the swab to pay the couriers.
- The second questionnaire is also to be completed at this time. It will mainly ask about any problems with the treatment.
- This survey can be returned by mail in the Reply Paid envelope.

## Your rights

- The information obtained from this trial will be treated as **confidential** and only seen by the researchers at the University of Melbourne, that is **not** by the staff in your clinic.
- Information from the surveys will be kept confidential subject to legal requirements and then will be destroyed after five years.
- If you wish to be informed of the results of this trial, please complete the section on the front of the first survey or contact Dr Marie Pirotta.
- If you have any concerns about the **conduct** of this study, please contact the Executive Officer, Human Research Ethics, The University of Melbourne, 8344 7507.

Thank-you for your time,

**Dr Marie Pirotta, GP and PhD student**

FAQs (Frequently Asked Questions)

## What if I get my period…?

- Many women are comfortable to continue using a vaginal pessary overnight while they have their period. However, if you prefer, you can skip using the pessaries just on the days when your period is particularly heavy.
  *(There is a question in survey 2, which asks you if you had to miss any doses of the interventions and why. So you can let us know how you have handled this issue.)*
- With regards to the second swab: it is probably better to take this when you don’t have your period. We would like to get this second swab about two weeks after you start in the trial. So if you think you might get your period when the swab is due, please take your swab a day or two earlier than scheduled. Likewise, you can delay taking it by a day or two if need be.
- Please ring Dr Marie Pirotta if you have any concerns.

## What if I think I have thrush while in the PAV trial?

- 1st preference: please return to see your GP for appropriate examination and testing before any treatment. PAV has asked for permission to be sent copies of the results of any swabs that you have taken while in the study.
- 2nd preference: if you prefer to treat yourself, please take your second swab and send it to the lab before you use any treatments. *(The second survey will ask you if you got any symptoms and how you handled it.)*

## What if I get any side-effects from the interventions?

- Remember that you may notice some tummy bloating or change in your bowel habit with the powder, or some extra vaginal discharge while using the pessaries.
- If you are experiencing unacceptable side-effects from using the powder or pessaries, please call Dr Marie Pirotta on 0417 102 643.
- If there is some delay in being able to contact Dr Pirotta, just stop using the interventions.

## What if I want to withdraw from the study?

- Of course you are free to withdraw from the study at any time.
- If you are thinking about leaving the study, please telephone Dr Marie Pirotta to discuss any problems, which perhaps could be helped.
- If you decide to withdraw, please still send the lab your second swab and mail your second survey before you withdraw, as the researchers are obliged to include all women’s results in the final analysis.

## What if my GP gives me a longer course of antibiotics?

- If your GP thinks you require a longer than usual course of antibiotics, please call me to see if you need a longer couse of the interventions.
- Your GP will tell you when your second swab and survey are then due.
- If you have any problems concerning this, please call Dr Marie Pirotta.

## What about my sex life?

- This will not be affected by use of the pessary.

## What do I have to do about this second swab?

- Your GP will probably have written the date that this swab is due on a reminder sticker for you in this take-home pack.
- If there is no date written there for you, please contact Dr Marie Pirotta.
- This swab should be taken on a weekday, ie Monday through to Friday.
- Once you have taken the swab, you can either drop it back to your GP if that is convenient, or else telephone “Couriers Please” 1300 361 000 to arrange for collection. There is a voucher stuck to the envelope for the swab in your Take-Home pack to pay for the courier to take the swab to the lab.

## What if the time to collect my second swab falls on a week-end or holiday?

- In this case, collect and send your second swab to the lab on the next working day.
